# Supplementary material for: Isolation and Characterization of Primary DMD Pig Muscle Cells as an In Vitro Model for Preclinical Research on Duchenne Muscular Dystrophy
Source: MDPI journal article supplement (doi:10.3390/life12101668), 2022-10-21

Collagen I  
(250 µg/ml)

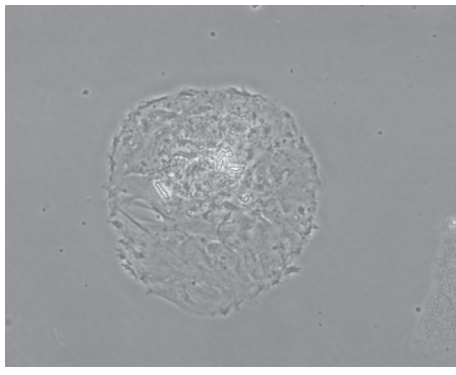

Collagen I (125 µg/ml)  
Collagen III (125 µg/ml)

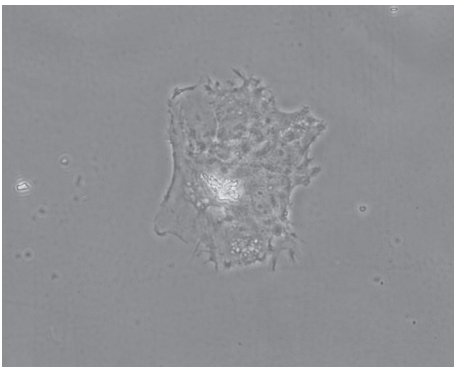

Fibronectin (125 µg/ml)  
Collagen IV (125 µg/ml)

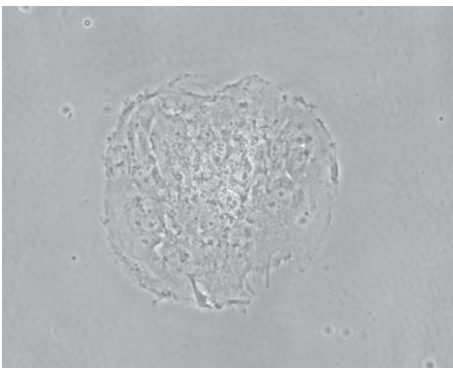

Collagen III  
(250 µg/ml)

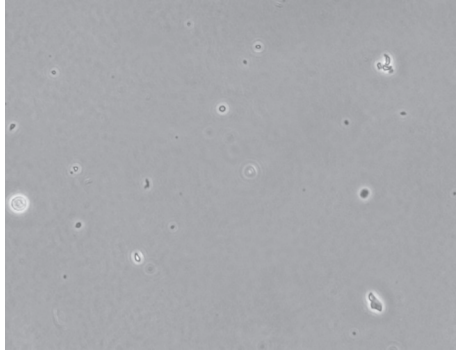

Collagen I (125 µg/ml)  
Collagen IV (125 µg/ml)

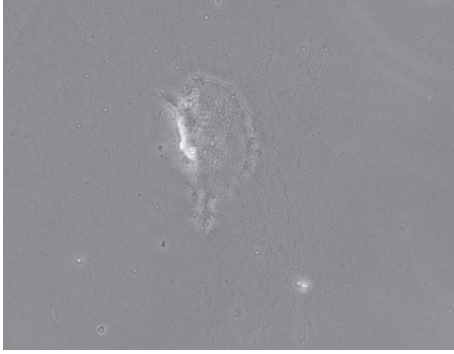

Fibronectin (125 µg/ml)  
Collagen VI (125 µg/ml)

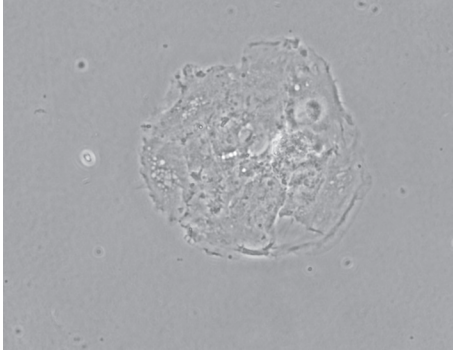

Collagen IV  
(250 µg/ml)

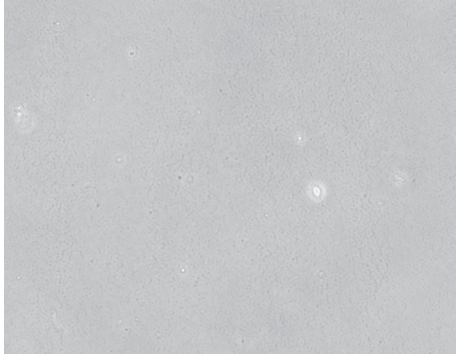

Collagen I (125 µg/ml)  
Collagen V (125 µg/ml)

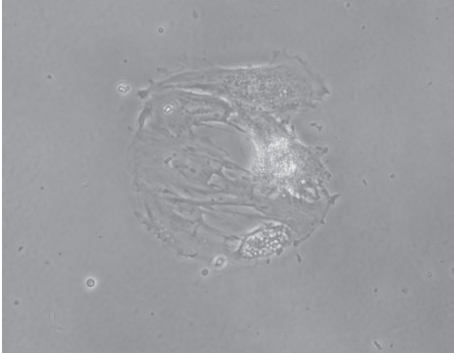

Fibronectin (125 µg/ml)  
Laminin (125 µg/ml)

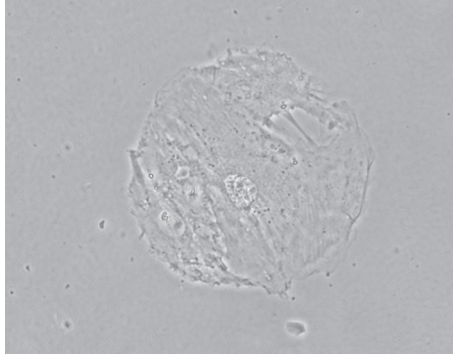

Collagen V  
(250 µg/ml)

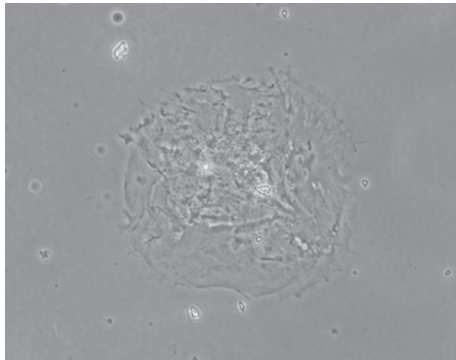

Collagen I (125 µg/ml)  
Collagen VI (125 µg/ml)

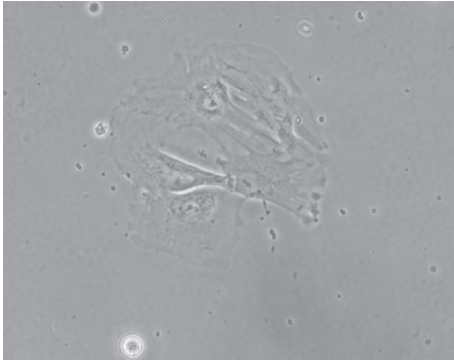

Fibronectin (125 µg/ml)  
Vitronectin (125 µg/ml)

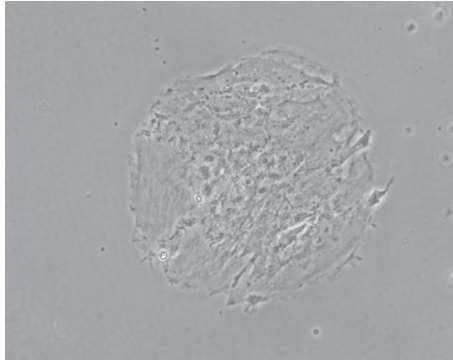

Collagen VI  
(250 µg/ml)

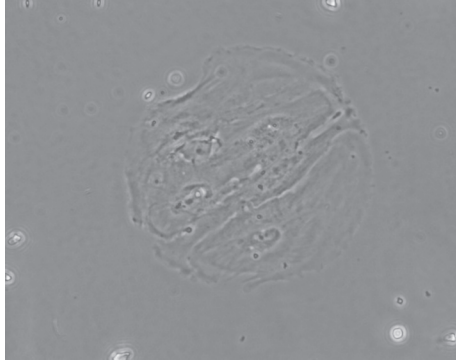

Collagen I (125 µg/ml)  
Fibronectin (125 µg/ml)

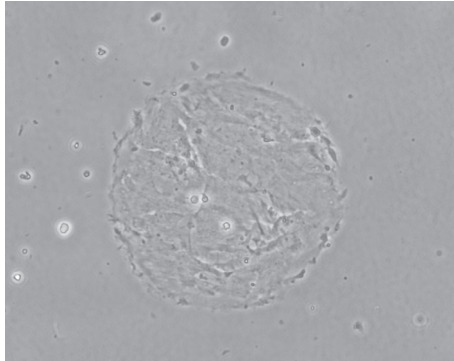

Laminin (125 µg/ml)  
Collagen IV (125 µg/ml)

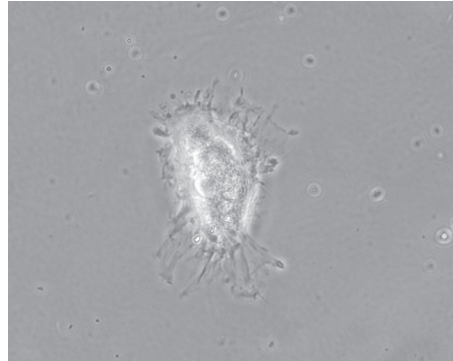

Fibronectin  
(250 µg/ml)

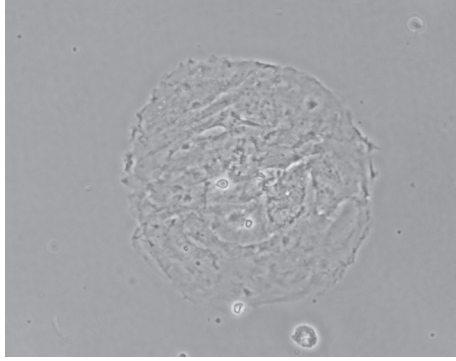

Collagen I (125 µg/ml)  
Laminin (125 µg/ml)

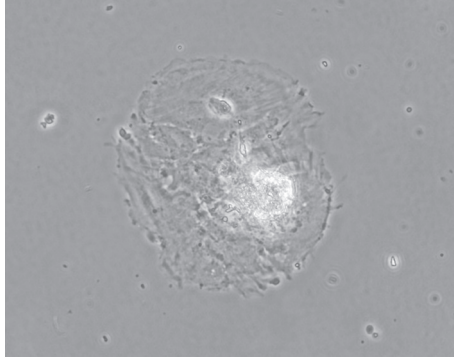

Laminin (125 µg/ml)  
Collagen VI (125 µg/ml)

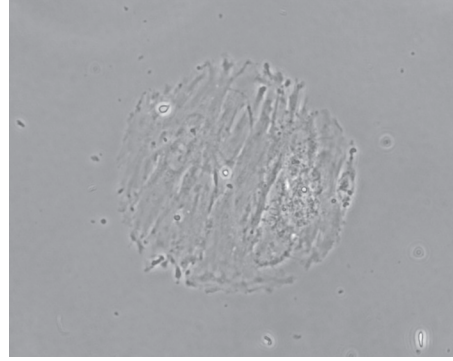

Laminin  
(250 µg/ml)

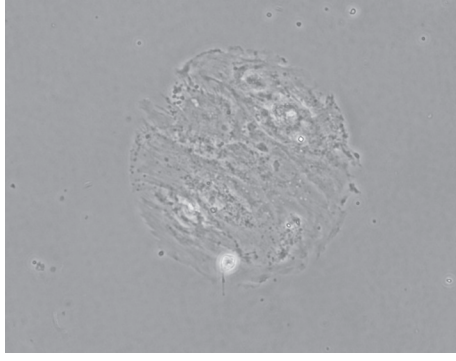

Collagen I (125 µg/ml)  
Vitronectin (125 µg/ml)

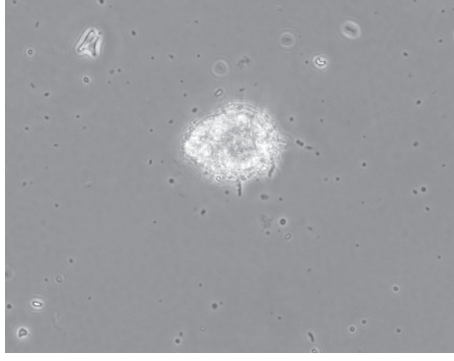

Vitronectin (125 µg/ml)  
Collagen IV (125 µg/ml)

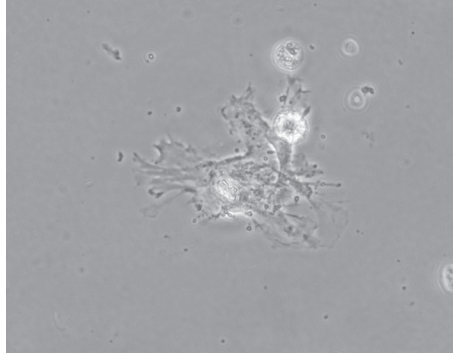

Vitronectin  
(250 µg/ml)

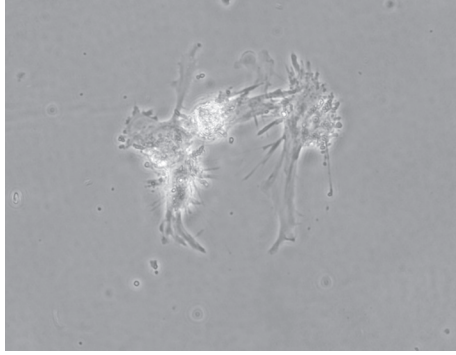

Collagen I (125 µg/ml)  
Topoelastin (125 µg/ml)

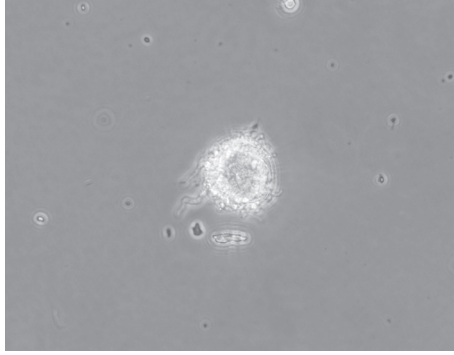

Vitronectin (125 µg/ml)  
Collagen VI (125 µg/ml)

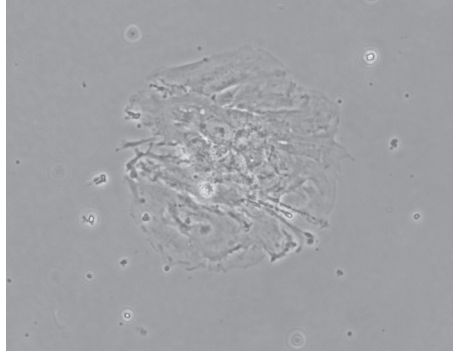

Topoelastin  
(250 µg/ml)

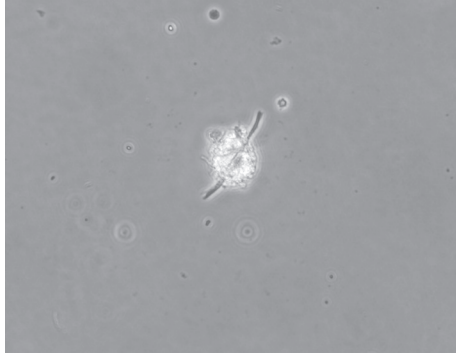

Fibronectin (83,3 µg/ml)  
Laminin (83,3 µg/ml)  
Collagen I (83,3 µg/ml)

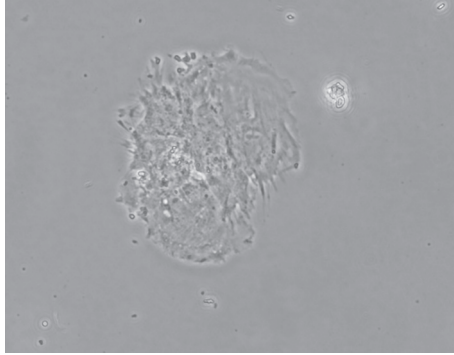

Vitronectin (125 µg/ml)  
Laminin (125 µg/ml)

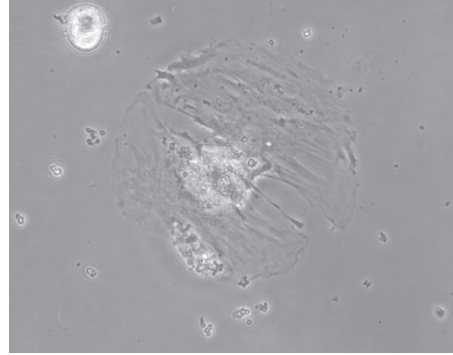

Collagen IV (125 µg/ml)  
Collagen VI (125 µg/ml)

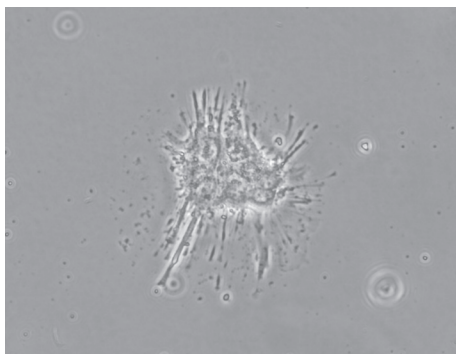

Fibronectin (83,3 µg/ml)  
Laminin (83,3 µg/ml)  
Collagen IV (83,3 µg/ml)

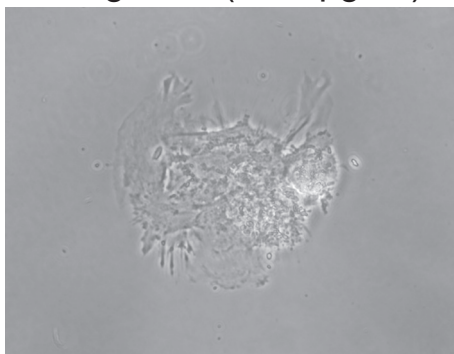

Vitronectin (125 µg/ml)  
Topoelastin (125 µg/ml)

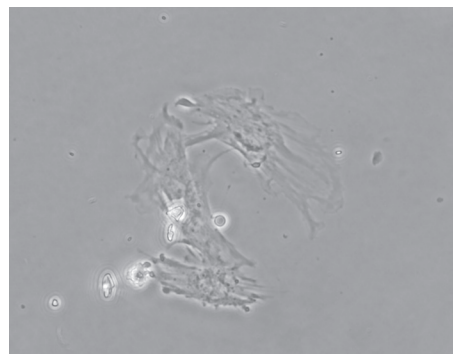

Collagen III (125 µg/ml)  
Collagen V (125 µg/ml)

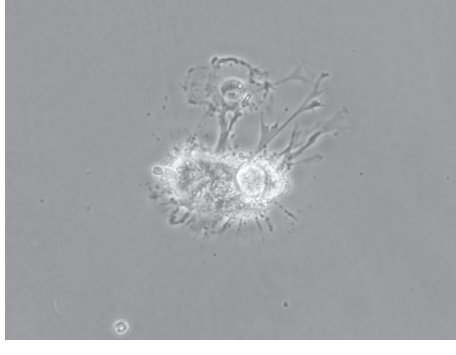

Vitronectin (62,5 µg/ml)  
Laminin (62,5 µg/ml)  
Collagen I (62,5 µg/ml)  
Collagen IV (62,5 µg/ml)

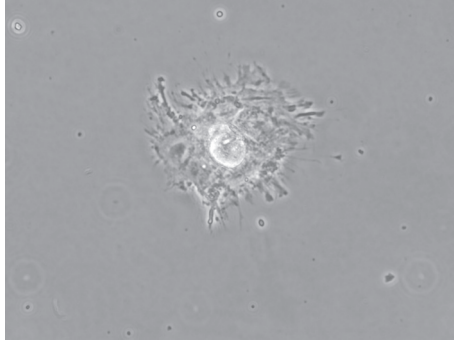

Collagen IV (125 µg/ml)  
Topoelastin (125 µg/ml)

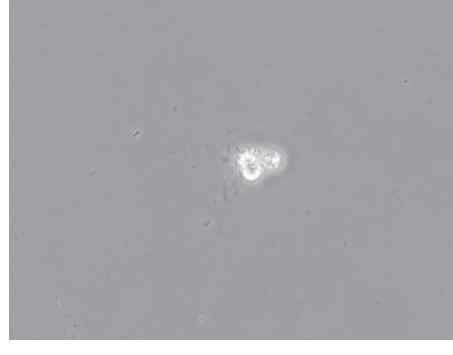

Negative Control  
BSA (250 µg/ml)

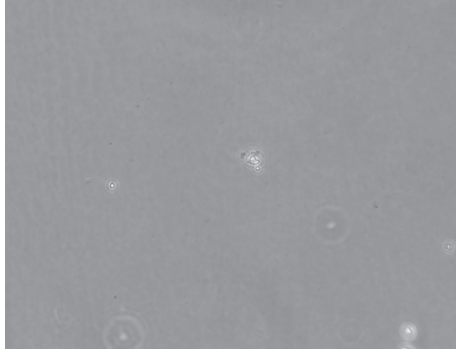

Fibronectin (62,5 µg/ml)  
Laminin (62,5 µg/ml)  
Collagen I (62,5 µg/ml)  
Collagen IV (62,5 µg/ml)

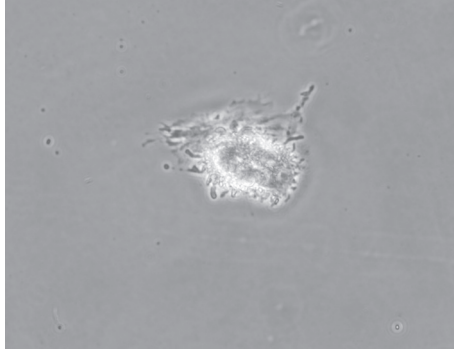

Collagen VI (125 µg/ml)  
Topoelastin (125 µg/ml)

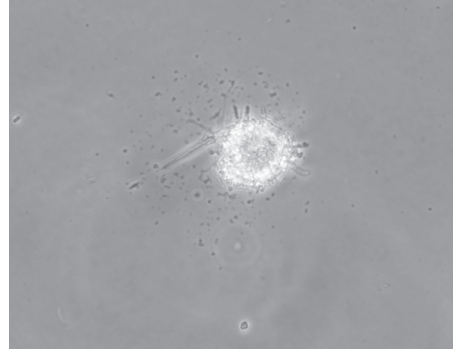

Supplement: s1 [file s1]
