# Supplementary material for: Isolation and Characterization of Primary DMD Pig Muscle Cells as an In Vitro Model for Preclinical Research on Duchenne Muscular Dystrophy
Source: MDPI journal article supplement (doi:10.3390/life12101668), 2022-10-21
Supplement: s1 [file s1]

Western Blots for Dystrophin

WB # 1

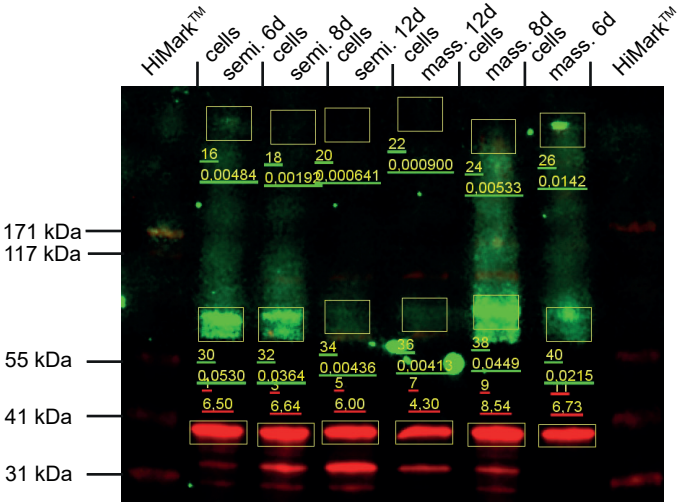

WB # 2

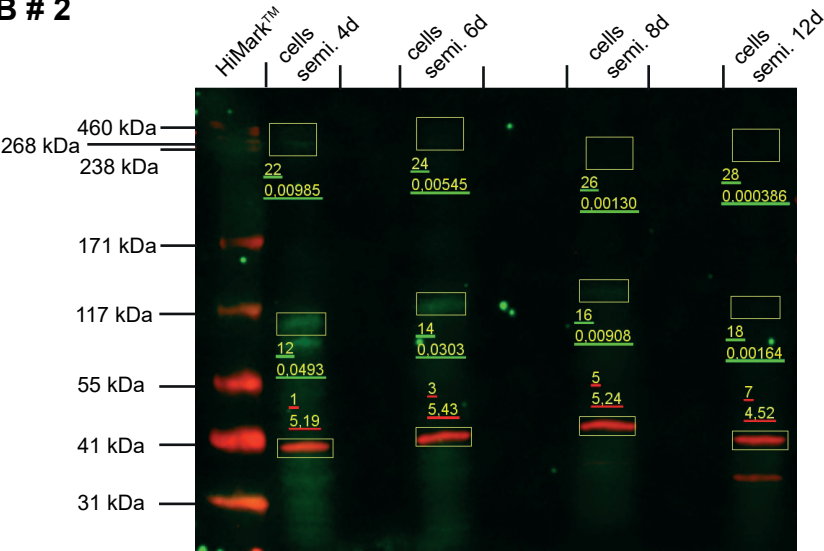

WB # 3

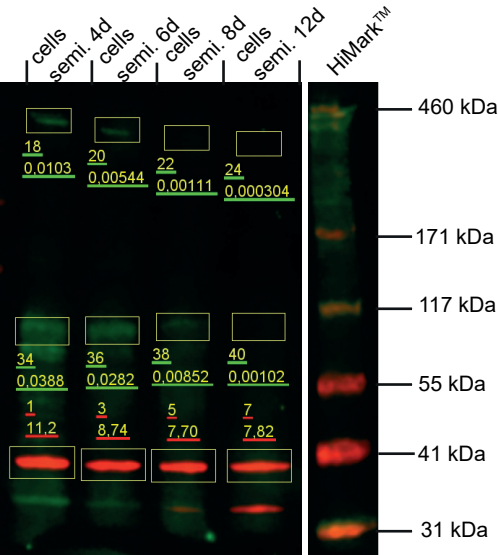

# LC5688: HiMark™ Unstained Protein Standard

Western Blots for Utrophin

WB # 4

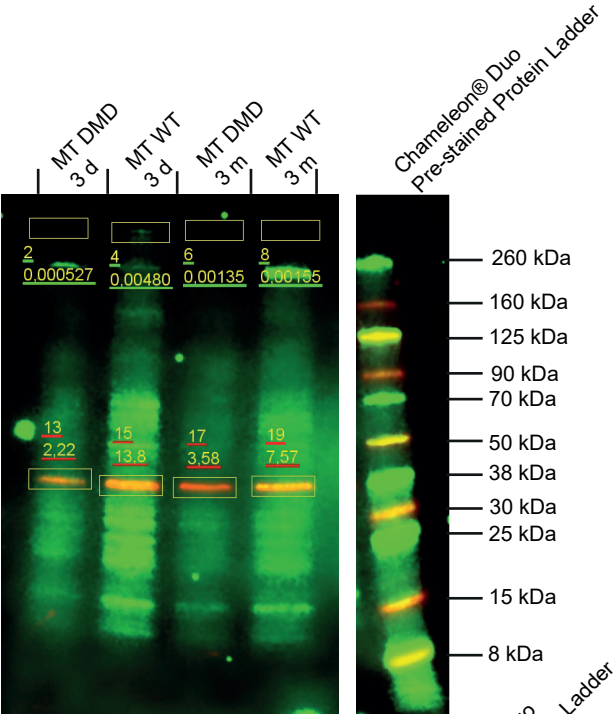

WB # 5

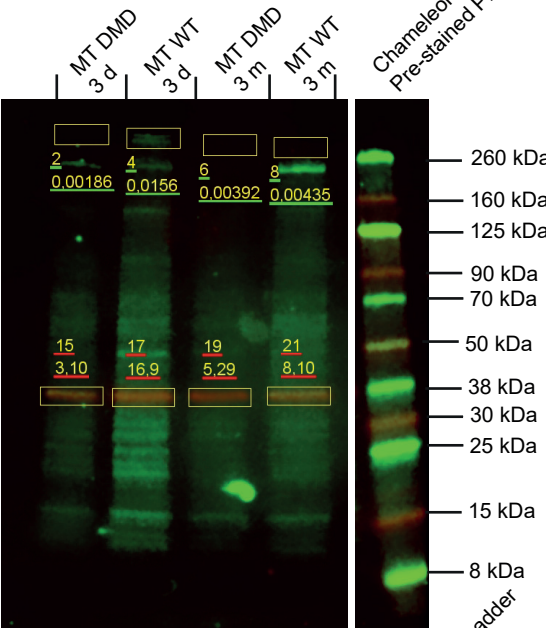

WB # 6

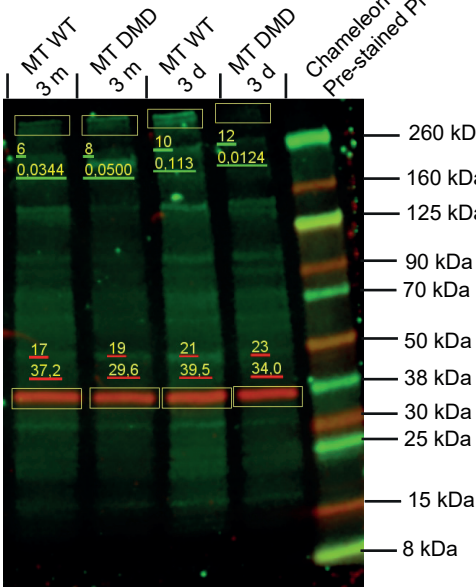

#928 -60000 Chameleon® Duo Pre-stained Protein Ladder
