# Supplementary figures and images for: Isolation and Characterization of Primary DMD Pig Muscle Cells as an In Vitro Model for Preclinical Research on Duchenne Muscular Dystrophy
Source: MDPI journal article supplement (doi:10.3390/life12101668), 2022-10-21

## Fusion index at day 6

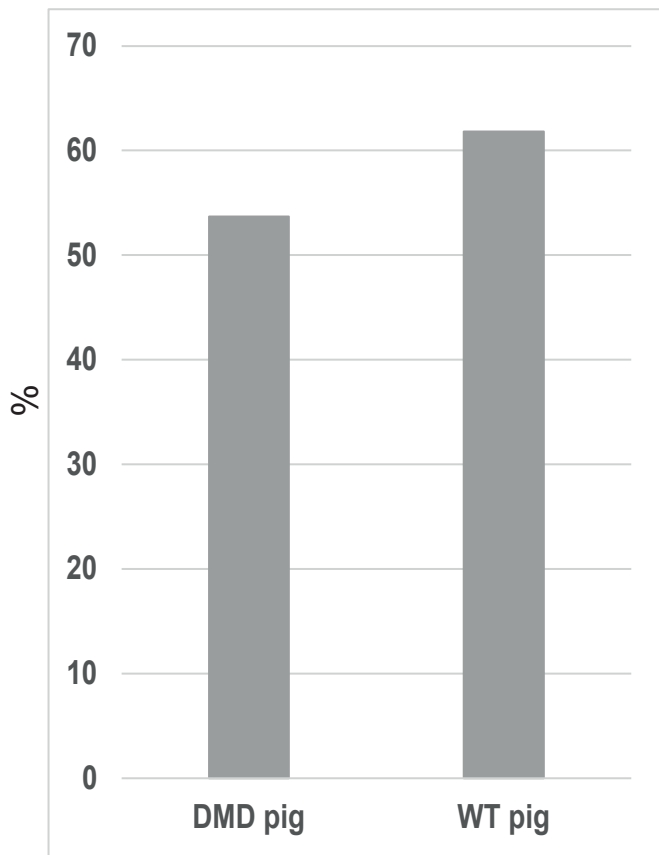

Supplement: s1 [file s1]

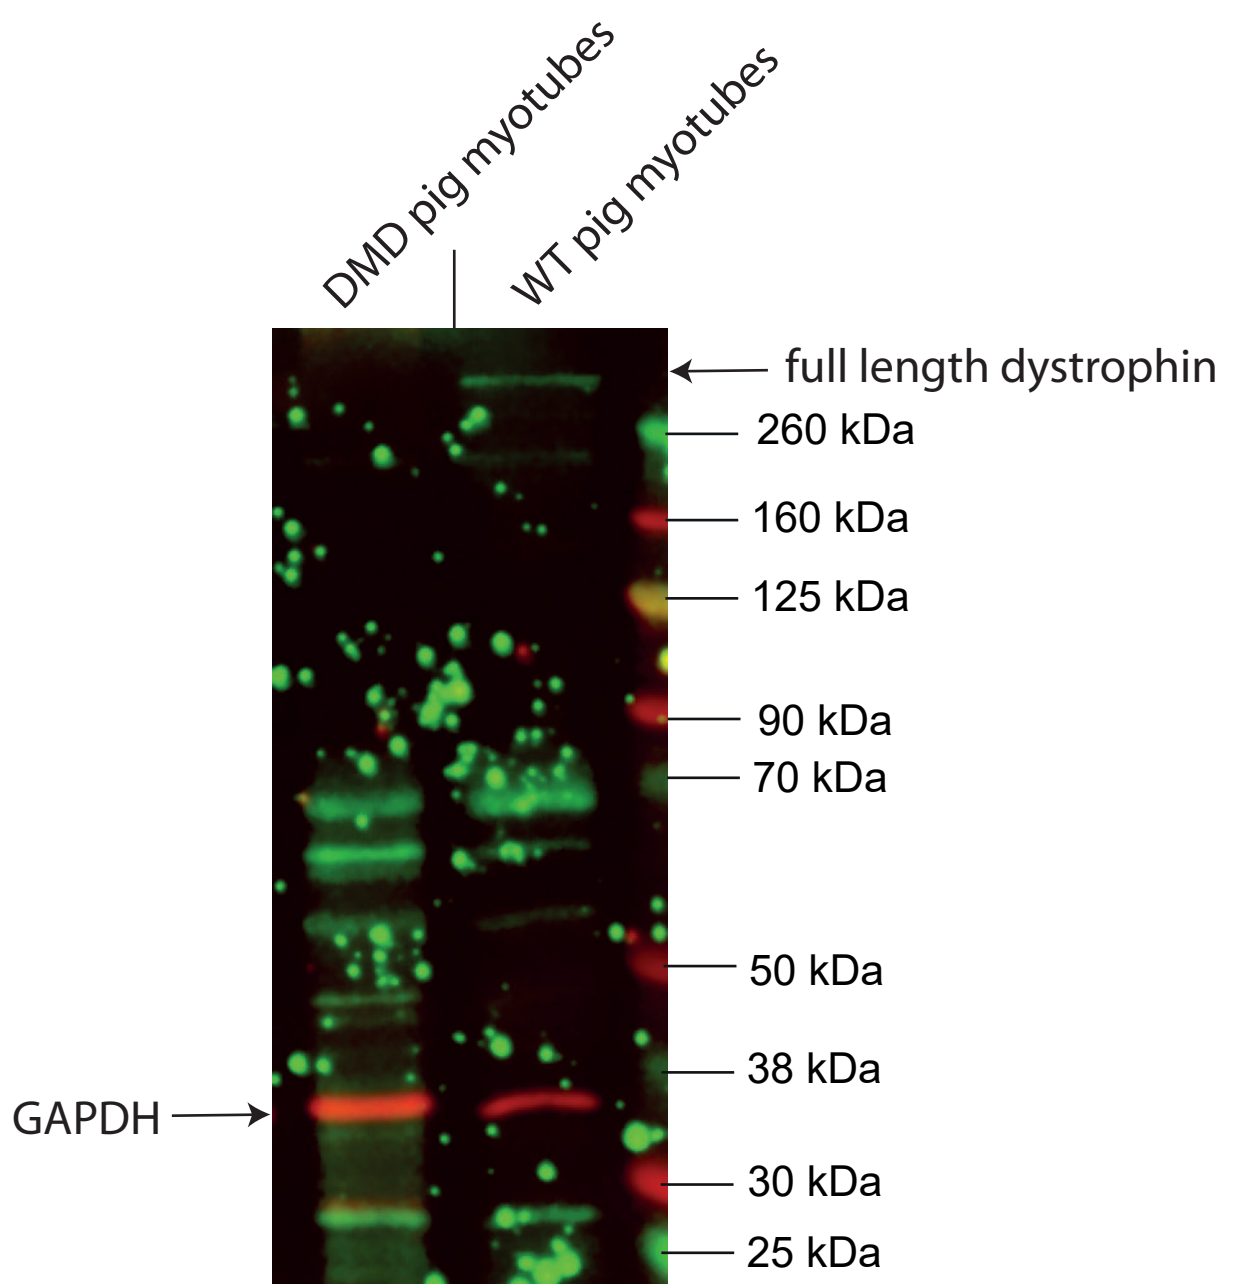

Dystrophin AB with IR800 secondary ab (green)  
GAPDH AB with IR680 secondary ab (red)

Supplement: s1 [file s1]

Number of cells per coated spot based on DAPI staining following PFA fixation

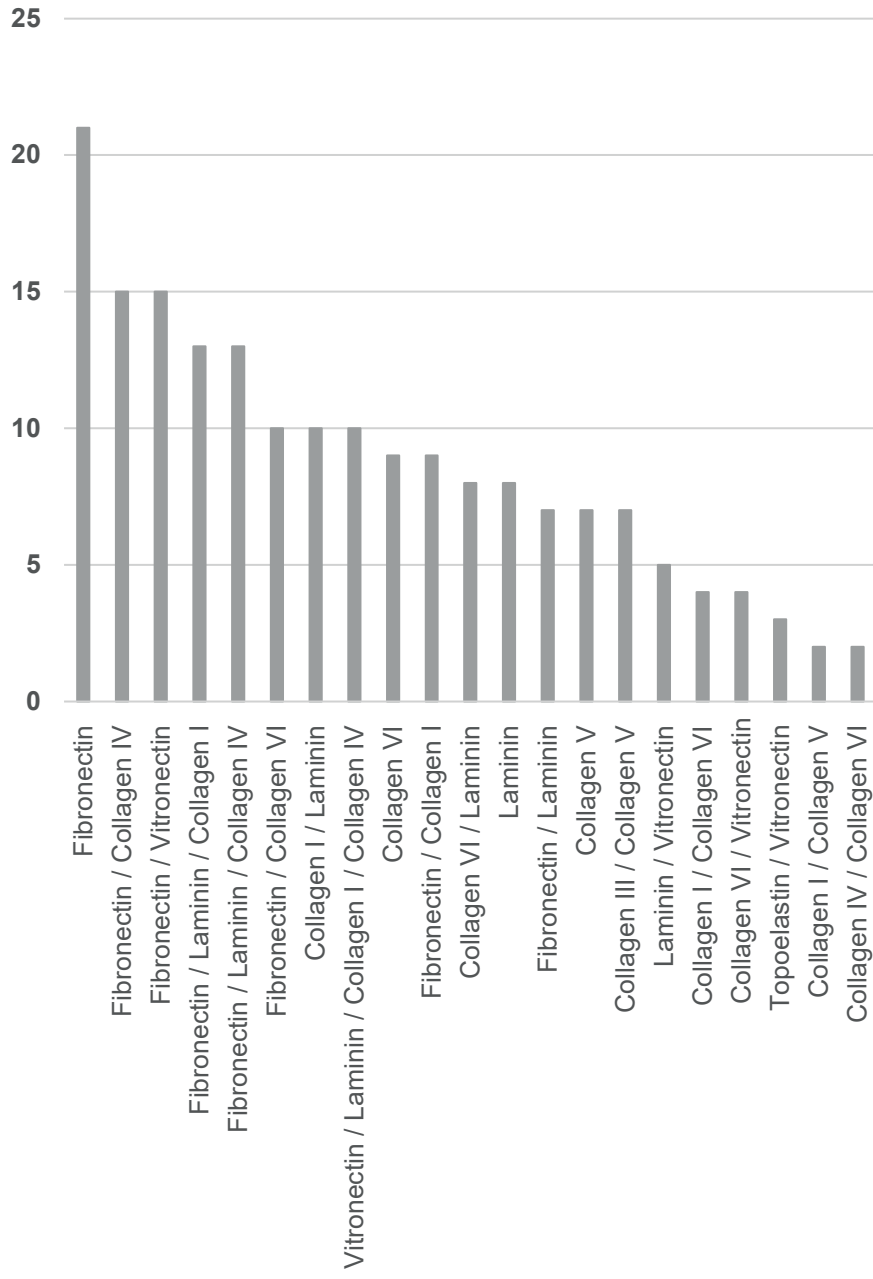

Supplement: s1 [file s1]
